# Supplementary material
Source: HighWire-hosted journal article supplement (https://ard.bmj.com/content/76/11/1862)
Supplement: inline-supplementary-material-2 [file inline-supplementary-material-2.docx]

Table S2. Percentage of missing data for placebo-controlled trials that shared trial data.

|  | Baseline Age | Sex | BMI | WOMAC pain | WOMAC function | K&L grade | Follow-up WOMAC pain  at short-term | WOMAC function at short-term | WOMAC pain at long-term | WOMAC function at long-term |
| --- | --- | --- | --- | --- | --- | --- | --- | --- | --- | --- |
| Clegg et al. | 0% | 0% | 0% | 0% | 0% | 0% | 18% | 18% | n.a. | n.a. |
| Fransen et al | 0% | 0% | 1% | 1% | 1% | 0% | n.a. | n.a. | 16% | 16% |
| McAlindon et al | 0% | 0% | 0% | 5% | 13% | n.a. | 33% | 43% | n.a. | n.a. |
| Rozendaal et al | 0% | 0% | 1% | 1% | 7% | 0% | 2% | 4% | 7% | 7% |
| Sawitzke et al | 0% | 0% | 0% | 0% | 0% | 0% | n.a. | n.a. | 46% | 46% |
